# Supplementary material
Source: publisher figshare collection journal article supplement (https://sage.figshare.com/ndownloader/files/24129759)
Supplement: Supplementary file 1 [file 24129759]

| <b>Supplemental Table 2: Most Common Elective Surgeries Within Specialties Predictive of NHD</b> |          |          |                                                                                                                                                                                                                     |
|--------------------------------------------------------------------------------------------------|----------|----------|---------------------------------------------------------------------------------------------------------------------------------------------------------------------------------------------------------------------|
| <b>CPT Code</b>                                                                                  | <b>#</b> | <b>%</b> | <b>Code Description</b>                                                                                                                                                                                             |
| <b>Orthopedic Surgery</b>                                                                        |          |          |                                                                                                                                                                                                                     |
| 27447                                                                                            | 3,510    | 19.0     | Arthroplasty, knee, condyle and plateau; medial AND lateral compartments with or without patella resurfacing (total knee arthroplasty)                                                                              |
| 27130                                                                                            | 2,023    | 11.0     | Arthroplasty, acetabular and proximal femoral prosthetic replacement (total hip arthroplasty), with or without autograft or allograft                                                                               |
| 63047                                                                                            | 304      | 1.6      | Laminectomy, facetectomy and foraminotomy (unilateral or bilateral with decompression of spinal cord, cauda equina and/or nerve root[s], [eg, spinal or lateral recess stenosis]), single vertebral segment; lumbar |
| <b>Neurosurgery</b>                                                                              |          |          |                                                                                                                                                                                                                     |
| 63047                                                                                            | 560      | 3.0      | Laminectomy, facetectomy and foraminotomy (unilateral or bilateral with decompression of spinal cord, cauda equina and/or nerve root[s], [eg, spinal or lateral recess stenosis]), single vertebral segment; lumbar |
| 22551                                                                                            | 117      | 0.6      | Arthrodesis, anterior interbody, including disc space preparation, discectomy, osteophytectomy and decompression of spinal cord and/or nerve roots; cervical below C2                                               |
| 22612                                                                                            | 73       | 0.4      | Arthrodesis, posterior or posterolateral technique, single level; lumbar (with lateral transverse technique, when performed)                                                                                        |
| <b>Cardiac Surgery</b>                                                                           |          |          |                                                                                                                                                                                                                     |
| 33405                                                                                            | 6        | 0.0      | Replacement, aortic valve, open, with cardiopulmonary bypass; with prosthetic valve other than homograft or stentless valve                                                                                         |
| 33533                                                                                            | 2        | 0.0      | Coronary artery bypass, using arterial graft(s); single arterial graft                                                                                                                                              |
| 33254                                                                                            | 2        | 0.0      | Operative tissue ablation and reconstruction of atria, limited (eg, modified maze procedure)                                                                                                                        |

NHD=non-home discharge; CPT=Current Procedural Terminology
